# Supplementary material
Source: PubMed Central journal article supplement (PMC7805087)
Supplement: NIHMS1564015-supplement-Supplemental_Material.pdf [file NIHMS1564015-supplement-Supplemental_Material.pdf]

## Online Supplement

### Behavioral Correlations within the Younger Adult Group

|                              | 1       | 2      | 3      | 4       | 5      | 6      | 7       | 8     | 9    | 10      | 11     | 12   | 13   | 14 |
|------------------------------|---------|--------|--------|---------|--------|--------|---------|-------|------|---------|--------|------|------|----|
| 1. Age                       | 1       |        |        |         |        |        |         |       |      |         |        |      |      |    |
| 2. Education                 | 0.84*** | 1      |        |         |        |        |         |       |      |         |        |      |      |    |
| 3. Stroop Effect             | -0.11   | -0.01  | 1      |         |        |        |         |       |      |         |        |      |      |    |
| 4. Total Verbal Fluency      | 0.20    | 0.16   | -0.41* | 1       |        |        |         |       |      |         |        |      |      |    |
| 5. FAS Total                 | 0.20    | 0.10   | -0.36* | 0.92*** | 1      |        |         |       |      |         |        |      |      |    |
| 6. Animals Total             | 0.13    | 0.20   | -0.35  | 0.77*** | 0.47** | 1      |         |       |      |         |        |      |      |    |
| 7. Vocabulary                | 0.26    | 0.48** | -0.07  | 0.22    | 0.19   | 0.19   | 1       |       |      |         |        |      |      |    |
| 8. Simple Speed (ms)         | 0.21    | 0.15   | -0.25  | 0.02    | 0.07   | -0.08  | 0.27    | 1     |      |         |        |      |      |    |
| 9. Complex Speed (ms)        | 0.24    | 0.22   | -0.07  | -0.16   | -0.11  | -0.19  | 0.23    | 0.45* | 1    |         |        |      |      |    |
| 10. Immediate Recall         | -0.06   | 0.03   | -0.05  | 0.25    | 0.14   | 0.35   | 0.48**  | 0.13  | 0.02 | 1       |        |      |      |    |
| 11. Delayed Recall           | -0.02   | 0.15   | -0.18  | 0.31    | 0.14   | 0.47** | 0.47**  | 0.02  | 0.07 | 0.78*** | 1      |      |      |    |
| 12. Recognition              | 0.00    | 0.18   | -0.40* | 0.15    | 0.01   | 0.33   | 0.32    | -0.11 | 0.03 | 0.37*   | 0.51** | 1    |      |    |
| 13. Nonverbal Working Memory | -0.09   | 0.15   | 0.16   | -0.23   | -0.22  | -0.16  | 0.16    | 0.14  | 0.20 | 0.02    | 0.16   | 0.04 | 1    |    |
| 14. Naming Accuracy          | 0.19    | 0.38*  | -0.11  | 0.23    | 0.16   | 0.26   | 0.69*** | 0.24  | 0.12 | 0.38*   | 0.39*  | 0.28 | 0.18 | 1  |

### Behavioral Correlations within the Older Adult Group

|                              | 1       | 2       | 3     | 4       | 5      | 6     | 7     | 8       | 9      | 10      | 11     | 12   | 13     | 14 |
|------------------------------|---------|---------|-------|---------|--------|-------|-------|---------|--------|---------|--------|------|--------|----|
| 1. Age                       | 1       |         |       |         |        |       |       |         |        |         |        |      |        |    |
| 2. Education                 | 0.04    | 1       |       |         |        |       |       |         |        |         |        |      |        |    |
| 3. Stroop Effect             | 0.10    | 0.20    | 1     |         |        |       |       |         |        |         |        |      |        |    |
| 4. Total Verbal Fluency      | -0.16   | 0.35    | 0.01  | 1       |        |       |       |         |        |         |        |      |        |    |
| 5. FAS Total                 | -0.13   | 0.38*   | -0.06 | 0.91*** | 1      |       |       |         |        |         |        |      |        |    |
| 6. Animals Total             | -0.02   | 0.03    | 0.08  | 0.33    | -0.08  | 1     |       |         |        |         |        |      |        |    |
| 7. Vocabulary                | 0.03    | 0.62*** | 0.15  | 0.36**  | 0.29*  | 0.22  | 1     |         |        |         |        |      |        |    |
| 8. Simple Speed (ms)         | 0.11    | -0.24   | 0.20  | 0.03    | -0.04  | 0.13  | 0.02  | 1       |        |         |        |      |        |    |
| 9. Complex Speed (ms)        | 0.51**  | -0.16   | 0.30  | -0.14   | -0.21  | 0.19  | 0.11  | 0.61*** | 1      |         |        |      |        |    |
| 10. Immediate Recall         | -0.27   | 0.19    | 0.06  | 0.59**  | 0.46*  | 0.34  | 0.33* | 0.16    | -0.15  | 1       |        |      |        |    |
| 11. Delayed Recall           | -0.26   | 0.15    | 0.14  | 0.51**  | 0.38*  | 0.29  | 0.30  | 0.07    | -0.06  | 0.88*** | 1      |      |        |    |
| 12. Recognition              | 0.02    | 0.20    | 0.27  | 0.18    | 0.14   | 0.07  | 0.21  | 0.24    | 0.14   | 0.46**  | 0.49** | 1    |        |    |
| 13. Nonverbal Working Memory | -0.36*  | -0.29   | -0.02 | 0.23    | 0.26   | -0.15 | -0.18 | 0.01    | -0.35  | 0.10    | 0.15   | 0.07 | 1      |    |
| 14. Naming Accuracy          | -0.43** | 0.13    | 0.09  | 0.47**  | 0.40** | 0.19  | 0.12  | 0.16    | -0.46* | 0.47**  | 0.51** | 0.16 | 0.6*** | 1  |

## **Order effects**

While conditions were randomized within each run for all participants, run order was only counterbalanced for younger adults. To assess for possible effects of order, we ran a linear regression analysis testing for a main effect of run order on accuracy, or an interaction between age group and run order to determine if there were any differential effects of run order on accuracy between groups.

### **Behavioral Order Effects**

Results indicated there was a main effect of run order, in which participants named pictures more accurately in the second run compared to the first run,  $\beta = 0.04$ ,  $F(3, 10780) = 11.08$ ,  $p < .001$ . The interaction between group and run order on accuracy was also significant,  $\beta = -0.04$ ,  $F(3, 10780) = 4.46$ ,  $p = .03$ . To better understand the interaction, we examined the simple effect of run order within each group. Results indicated that older adults were more accurate in the second run than in the first run,  $\beta = 0.04$ ,  $F(1, 5383) = 10.69$ ,  $p < .001$ , and that there was no significant differences in run accuracies within younger adults,  $\beta = 0.004$ ,  $F(1, 5397) = 0.12$ ,  $p = .7$ , suggesting that the older adults were driving the main effect of run order on accuracy. We also ran two additional order effects analyses after determining that the older adults were driving the main effect of run order on accuracy to determine whether there were significantly different effects of accuracy between each run. We found that during run one, younger adults performed significantly better than the older adults,  $\beta = 0.06$ ,  $F(1, 5383) = 22.8$ ,  $p < .001$ ; however, during run two, there were no significant differences in accuracy performance between younger and older adults,  $\beta = 0.01$ ,  $F(1, 5397) = 3.47$ ,  $p = .06$ , meaning that older adults' performance significantly improved during the second run.

### **fMRI Order Effects**

A separate analysis was conducted to determine if there were effects of run order on functional activation. Results indicated that there were no main effects of run order on functional activation.

However, there was a significant interaction between run order and group. Overall, younger adults had more functional activation in the first run compared to the second run in the brainstem, right insula, and left orbital frontal cortex. Older adults had more activation in the brainstem during the second run compared to the first.

## List of 180 Picture Names and Associated Lexical Characteristics

Target picture names (item) sorted by frequency condition with their associated lexical characteristics. Age of acquisition ratings for items from Brodeur, Dionne-Dotsie, Montreuil, & Lepage (2010) and Brodeur, Guérard, & Bouras (2014) were obtained from Kuperman, Stadthagen-Gonzalez, and Brysbaert (2012). Name agreement refers to the percent of individuals who responded with the item name in the normed picture databases.

| Item    | Frequency Condition | Log HAL Frequency | Length | Phonemes | Syllables | Name Agreement | H-Index | Age of Acquisition | Familiarity  | Visual Complexity |
|---------|---------------------|-------------------|--------|----------|-----------|----------------|---------|--------------------|--------------|-------------------|
| apron   | Low                 | 6.292             | 5      | 5        | 2         | 95             | 0.32    | 6.75 (2.24)        | 4.57 (0.80)  | 1.93 (0.97)       |
| avocado | Low                 | 5.704             | 7      | 7        | 4         | 70             | 0.74    | 5.52(1.48)         | 3.24(1.39)   | 1.85 (0.83)       |
| awning  | Low                 | 4.317             | 6      | 4        | 2         | 59             | 1.91    | 11.06 (4.02)       | 4.15 (1.04)  | 1.90 (0.74)       |
| bandage | Low                 | 5.802             | 7      | 6        | 2         | 42             | 2.82    | 5.94 (2.88)        | 3.84 (1.21)  | 2.43 (1.14)       |
| beehive | Low                 | 5.366             | 7      | 5        | 2         | 63             | 1.55    | 7.47 (5.05)        | 3.98 (1.32)  | 3.56 (1.23)       |
| beret   | Low                 | 6.078             | 5      | 4        | 2         | 54             | 2.16    | 10.33 (3.94)       | 3.61 (1.44)  | 1.70 (0.94)       |
| bib     | Low                 | 6.661             | 3      | 3        | 1         | 84             | 0.84    | 4.53 (4.25)        | 3.79 (1.30)  | 2.54 (1.33)       |
| birdie  | Low                 | 6.404             | 6      | 4        | 2         | 38             | 5.16    | 6.56 (3.45)        | 3.86 (1.44)  | 2.78 (1.34)       |
| broom   | Low                 | 6.397             | 5      | 4        | 1         | 94             | 0.37    | 5.50 (2.46)        | 4.26 (0.91)  | 2.29 (1.01)       |
| buoy    | Low                 | 5.1               | 4      | 3        | 2         | 62             | 1.88    | 9.76 (2.97)        | 2.80 (1.34)  | 3.41 (1.19)       |
| cheetah | Low                 | 6.165             | 7      | 4        | 2         | 32             | 2.57    | 4.85 (1.55)        | 2.23 (1.07)  | 3.48 (1.12)       |
| crayon  | Low                 | 5.727             | 6      | 5        | 2         | 82             | 1.13    | 3.20 (1.47)        | 4.10 (1.41)  | 1.92 (1.06)       |
| cupcake | Low                 | 4.369             | 7      | 6        | 2         | 95             | 0.32    | 4.11 (1.23)        | 4.81 (0.45)  | 2.26 (1.01)       |
| dolly   | Low                 | 6.497             | 5      | 4        | 2         | 61             | 2.06    | —                  | 4.24 (0.99)  | 2.05 (0.89)       |
| dropper | Low                 | 5.17              | 7      | 5        | 2         | 72             | 1.64    | 8.56 (3.36)        | 3.16 (1.52)  | 2.53 (1.13)       |
| dustpan | Low                 | 2.303             | 7      | 6        | 2         | 82             | 0.92    | 6.47 (2.50)        | 4.23 (1.04)  | 2.05 (1.05)       |
| eraser  | Low                 | 6.385             | 6      | 5        | 3         | 92             | 0.47    | 4.95 (1.22)        | 4.33 (1.03)  | 1.87 (0.83)       |
| faucet  | Low                 | 6.084             | 6      | 5        | 2         | 65             | 1.91    | 6.29 (2.80)        | 4.71 (0.55)  | 2.02 (0.87)       |
| flask   | Low                 | 6.696             | 5      | 5        | 1         | 56             | 2.47    | 10.78 (3.86)       | 3.55 (1.27)  | 2.97 (1.20)       |
| fondue  | Low                 | 4.466             | 6      | 5        | 2         | 74             | 0.7     | 6.42(1.08)         | 2.71 (1.15)  | 3.77 (1.05)       |
| frisbee | Low                 | 6.472             | 7      | 6        | 2         | 95             | 0.34    | 5.50 (1.98)        | 4.40 (1.06)  | 1.78 (1.01)       |
| gavel   | Low                 | 4.92              | 5      | 4        | 2         | 58             | 2.19    | 9.22 (3.23)        | 4.14 (0.95)  | 1.98 (0.95)       |
| gazebo  | Low                 | 4.86              | 6      | 6        | 3         | 72             | 1.69    | 9.76 (3.03)        | 3.76 (1.10 ) | 2.79 (1.12)       |
| giraffe | Low                 | 5.938             | 7      | 5        | 2         | 97             | 0.1     | 2.49(1.04)         | 3.41(1.41)   | 3.24 (1.18)       |

|         |     |       |   |   |   |    |      |              |             |             |
|---------|-----|-------|---|---|---|----|------|--------------|-------------|-------------|
| grater  | Low | 4.86  | 6 | 5 | 2 | 52 | 1.18 | 8.88 (2.74)  | 4.33 (0.96) | 2.69 (1.30) |
| hubcap  | Low | 4.19  | 6 | 6 | 2 | 24 | 3.56 | 8.39 (3.27)  | 4.14 (0.93) | 2.38 (1.25) |
| hyena   | Low | 4.942 | 5 | 5 | 3 | 68 | 1.78 | 6.61 (2.00)  | 3.27 (1.07) | 3.12 (1.29) |
| ladle   | Low | 5.069 | 5 | 4 | 2 | 57 | 2.13 | 9.83 (3.59)  | 4.16 (1.08) | 1.95 (1.12) |
| ladybug | Low | 4.942 | 7 | 7 | 3 | 93 | 0.48 | 4.84 (2.03)  | 4.69 (0.60) | 2.79 (1.49) |
| leek    | Low | 5.303 | 4 | 3 | 1 | 65 | 1.72 | 4.79 (1.64)  | 3.77 (1.14) | 2.33 (0.89) |
| manatee | Low | 4.644 | 7 | 6 | 3 | 8  | 2.86 | 6.51 (1.07)  | 1.64 (0.9)  | 2.88 (1.02) |
| mitten  | Low | 4.934 | 6 | 4 | 2 | 67 | 1.18 | 4.72 (1.74)  | 4.29 (0.96) | 2.28 (1.02) |
| moth    | Low | 6.244 | 4 | 3 | 1 | 67 | 1.21 | 4.52 (1.52)  | 3.24 (1.22) | 3.22 (1.16) |
| mussel  | Low | 3.989 | 6 | 4 | 2 | 92 | 0.51 | 3.77 (1.14)  | 3.99 (0.98) | 1.8 (0.84)  |
| napkin  | Low | 5.756 | 6 | 6 | 2 | 41 | 2.89 | 4.79 (2.51)  | 4.02 (1.16) | 2.57 (1.25) |
| ostrich | Low | 6.061 | 7 | 6 | 2 | 96 | 0.2  | 3.54 (1.32)  | 2.91 (1.1)  | 3.18 (1.13) |
| pliers  | Low | 6.593 | 6 | 5 | 1 | 85 | 0.9  | 7.00 (1.76)  | 3.77 (1.25) | 2.74 (1.04) |
| plum    | Low | 6.715 | 4 | 4 | 1 | 86 | 0.85 | 5.50 (2.20)  | 4.32 (1.04) | 2.44 (1.33) |
| plunger | Low | 6.165 | 7 | 6 | 2 | 84 | 1.01 | 9.63 (4.94)  | 3.95 (1.23) | 1.95 (1.05) |
| raccoon | Low | 5.617 | 7 | 5 | 2 | 97 | 0.2  | 6.79 (4.79)  | 3.81 (1.21) | 3.21 (1.28) |
| radish  | Low | 4.934 | 6 | 5 | 2 | 86 | 0.76 | 5.25 (1.89)  | 4.05 (1.23) | 2.62 (1.29) |
| raisin  | Low | 5.749 | 6 | 4 | 2 | 83 | 0.4  | 4.09 (1.43)  | 3.64 (1.09) | 2.46 (1.14) |
| rooster | Low | 6.246 | 7 | 5 | 2 | 90 | 0.46 | 2.33 (0.83)  | 3.81 (1.1)  | 3.1 (1.19)  |
| sandal  | Low | 4.984 | 6 | 5 | 2 | 92 | 0.46 | 5.21 (2.12)  | 4.34 (1.07) | 2.42 (1.18) |
| scalpel | Low | 5.313 | 7 | 7 | 2 | 56 | 2.28 | 10.73 (3.05) | 3.40 (1.23) | 2.07 (0.95) |
| slipper | Low | 5.811 | 7 | 5 | 2 | 82 | 0.8  | 5.26 (2.37)  | 4.15 (1.20) | 2.13 (1.08) |
| stapler | Low | 4.331 | 7 | 6 | 3 | 93 | 0.1  | 3.97 (1.31)  | 4.36 (0.84) | 3.09 (1.28) |
| teabag  | Low | 3.892 | 6 | 5 | 2 | 95 | 0.34 | 6.67 (2.97)  | 4.44 (0.99) | 2.41 (1.33) |
| teapot  | Low | 5.781 | 6 | 5 | 2 | 86 | 0.58 | 4.15 (1.42)  | 3.58 (1.14) | 2.63 (0.88) |
| thimble | Low | 4.736 | 7 | 5 | 2 | 81 | 1.12 | 8.05 (3.10)  | 3.31 (1.62) | 2.28 (1.09) |
| tinsel  | Low | 4.949 | 6 | 5 | 2 | 24 | 3.09 | 6.61 (1.79)  | 4.05 (1.15) | 2.24 (1.26) |
| tongs   | Low | 5.361 | 5 | 4 | 1 | 79 | 1.22 | 7.78 (2.55)  | 4.00 (1.10) | 1.95 (0.97) |
| toucan  | Low | 4.19  | 6 | 5 | 2 | 58 | 1.83 | 5.30 (1.43)  | 2.3 (1.07)  | 3.41 (0.91) |
| tuba    | Low | 6.028 | 4 | 4 | 2 | 14 | 2.24 | 5.82 (1.36)  | 2.24 (1.19) | 3.73 (1.11) |
| tulip   | Low | 6.109 | 5 | 5 | 2 | 61 | 1.42 | 4.28 (1.39)  | 3.42 (1.2)  | 2.22 (0.95) |

|           |        |       |   |   |   |     |      |             |             |             |
|-----------|--------|-------|---|---|---|-----|------|-------------|-------------|-------------|
| urinal    | Low    | 5.561 | 6 | 6 | 3 | 89  | 0.67 | 8.87 (3.44) | 4.10 (1.10) | 1.95 (0.96) |
| vase      | Low    | 6.292 | 4 | 3 | 1 | 84  | 1    | 7.89 (2.59) | 3.72 (1.34) | 2.54 (1.25) |
| vulture   | Low    | 5.971 | 7 | 5 | 2 | 70  | 1.01 | 8.89 (2.16) | 3.98 (1.11) | 3.41 (1.34) |
| warthog   | Low    | 5.252 | 7 | 7 | 2 | 38  | 2.15 | 7.82 (3.75) | 3.45 (1.23) | 3.17 (1.36) |
| whisk     | Low    | 5.704 | 5 | 5 | 1 | 71  | 1.55 | 5.72 (2.54) | 3.82 (1.25) | 2.49 (1.19) |
| anchor    | Medium | 7.925 | 6 | 4 | 2 | 93  | 0.45 | 4.32 (1.57) | 4.20 (1.05) | 1.85 (0.82) |
| ant       | Medium | 7.928 | 3 | 3 | 1 | 96  | 0.2  | 2.03 (0.77) | 4.46 (0.89) | 2.08 (1)    |
| backpack  | Medium | 7.567 | 8 | 6 | 2 | 77  | 1.34 | 5.83 (1.94) | 4.67 (0.74) | 3.38 (1.39) |
| bacon     | Medium | 8.054 | 5 | 5 | 2 | 77  | 1.01 | 5.00 (1.91) | 4.40 (1.06) | 2.05 (1.17) |
| badger    | Medium | 7.369 | 6 | 4 | 2 | 54  | 2.37 | 8.74 (2.64) | 3.22 (1.19) | 3.37 (1.26) |
| barn      | Medium | 7.854 | 4 | 4 | 1 | 71  | 1.68 | 4.50 (1.62) | 4.00 (0.96) | 2.55 (1.23) |
| beaver    | Medium | 7.454 | 6 | 4 | 2 | 100 | 0    | 5.21 (1.65) | 4.17 (1.17) | 3.21 (1.39) |
| bee       | Medium | 8.098 | 3 | 2 | 1 | 61  | 1.75 | 2.90 (1.03) | 3.46 (1.13) | 3.24 (1.23) |
| bucket    | Medium | 8.11  | 6 | 5 | 2 | 58  | 1.76 | 5.61 (2.40) | 3.95 (1.28) | 2.03 (1.01) |
| buddha    | Medium | 7.84  | 5 | 4 | 2 | 45  | 1.95 | —           | 4.19 (0.92) | 2.90 (1.38) |
| butterfly | Medium | 7.494 | 9 | 7 | 3 | 99  | 0.1  | 2.28 (0.97) | 4.17 (0.86) | 2.59 (1.21) |
| chalk     | Medium | 7.416 | 5 | 3 | 1 | 100 | 0    | 4.47 (1.17) | 3.66 (1.60) | 1.66 (0.94) |
| clipboard | Medium | 7.589 | 9 | 8 | 2 | 79  | 1.27 | 7.76 (1.95) | 4.08 (1.22) | 2.08 (1.05) |
| comb      | Medium | 7.386 | 4 | 3 | 1 | 87  | 0.73 | 5.50 (2.20) | 4.38 (1.07) | 1.90 (0.97) |
| compass   | Medium | 7.549 | 7 | 6 | 2 | 95  | 0.33 | 8.44 (2.38) | 4.31 (0.98) | 2.69 (1.22) |
| cooler    | Medium | 7.849 | 6 | 4 | 2 | 63  | 2.04 | 6.11 (1.53) | 4.00 (1.21) | 2.03 (1.06) |
| curtain   | Medium | 7.577 | 7 | 4 | 2 | 86  | 0.87 | 4.95 (1.23) | 4.76 (0.66) | 1.86 (0.93) |
| diploma   | Medium | 7.304 | 7 | 7 | 3 | 55  | 2.04 | 9.33 (3.16) | 4.24 (1.03) | 1.67 (0.95) |
| dolphin   | Medium | 7.405 | 7 | 6 | 2 | 99  | 0.11 | 3.01 (1.08) | 3.19 (1.29) | 2.33 (0.97) |
| dragonfly | Medium | 7.526 | 9 | 9 | 3 | 46  | 1.87 | 6.80 (2.89) | 4.12 (0.97) | 4.03 (1.15) |
| elbow     | Medium | 8.132 | 5 | 4 | 2 | 86  | 0.77 | 4.78 (1.70) | 4.90 (0.37) | 1.88 (1.23) |
| feather   | Medium | 7.768 | 7 | 4 | 2 | 100 | 0    | 4.67 (1.81) | 3.95 (1.32) | 2.49 (1.25) |
| ferry     | Medium | 7.832 | 5 | 4 | 2 | 31  | 2.85 | 8.00 (1.94) | 4.10 (1.10) | 3.55 (1.35) |
| fridge    | Medium | 7.377 | 6 | 4 | 1 | 71  | 1.16 | 4.67 (1.33) | 4.88 (0.45) | 4.22 (1.10) |
| fries     | Medium | 7.429 | 5 | 4 | 1 | 52  | 1.27 | —           | 4.93 (0.26) | 4.03 (1.03) |
| frog      | Medium | 8.048 | 4 | 4 | 1 | 55  | 1.13 | 4.32 (1.45) | 3.62 (1.26) | 3.22 (1.50) |

|            |        |       |    |   |   |     |      |             |             |             |
|------------|--------|-------|----|---|---|-----|------|-------------|-------------|-------------|
| goose      | Medium | 7.49  | 5  | 3 | 1 | 52  | 1.59 | 3.28 (1.54) | 3.28 (1.1)  | 2.38 (0.92) |
| harp       | Medium | 7.419 | 4  | 4 | 1 | 92  | 0.3  | 4.30 (1.37) | 2.73 (1.22) | 3.33 (1.12) |
| helicopter | Medium | 8.071 | 10 | 9 | 4 | 90  | 0.64 | 6.42 (1.14) | 1.49 (0.9)  | 3.41 (1.01) |
| kite       | Medium | 7.76  | 4  | 3 | 1 | 98  | 0.16 | 4.58 (1.64) | 4.43 (0.77) | 2.94 (1.48) |
| kiwi       | Medium | 7.24  | 4  | 4 | 2 | 83  | 0.89 | 7.56 (3.99) | 3.83 (1.36) | 2.22 (1.16) |
| ladder     | Medium | 7.996 | 6  | 4 | 2 | 95  | 0.32 | 4.40 (1.70) | 4.60 (0.77) | 1.93 (0.92) |
| lantern    | Medium | 7.632 | 7  | 6 | 2 | 60  | 2.11 | 8.55 (2.72) | 4.02 (1.05) | 2.45 (1.04) |
| lime       | Medium | 7.643 | 4  | 3 | 1 | 81  | 1.12 | 6.61 (2.99) | 3.72 (1.49) | 2.24 (1.13) |
| locker     | Medium | 7.534 | 6  | 4 | 2 | 98  | 0.16 | 8.22 (2.32) | 4.76 (0.48) | 1.60 (0.59) |
| moose      | Medium | 8.153 | 5  | 3 | 1 | 95  | 0.33 | 5.22 (1.73) | 4.29 (0.89) | 3.07 (1.54) |
| mug        | Medium | 7.404 | 3  | 3 | 1 | 50  | 1.72 | 5.15 (2.03) | 4.88 (0.33) | 1.38 (0.70) |
| mummy      | Medium | 7.884 | 5  | 4 | 2 | 86  | 0.85 | 5.47 (2.34) | 4.00 (1.10) | 3.52 (1.25) |
| mushroom   | Medium | 7.535 | 8  | 6 | 2 | 100 | 0    | 6.44 (2.36) | 4.64 (0.63) | 2.31 (1.32) |
| m          |        |       |    |   |   |     |      |             |             |             |
| onion      | Medium | 7.858 | 5  | 5 | 2 | 99  | 0    | 2.72 (1.00) | 4.66 (0.62) | 1.47 (0.66) |
| parrot     | Medium | 7.479 | 6  | 5 | 2 | 71  | 1.25 | 5.58 (1.87) | 4.10 (1.08) | 3.19 (1.47) |
| peach      | Medium | 7.502 | 5  | 3 | 1 | 89  | 0.65 | 2.54 (0.87) | 4.29 (1)    | 1.47 (0.75) |
| peanut     | Medium | 7.668 | 6  | 5 | 2 | 92  | 0.46 | 2.87 (1.00) | 4.14 (0.92) | 1.85 (0.82) |
| penguin    | Medium | 7.706 | 7  | 7 | 2 | 99  | 0    | 3.30 (1.10) | 2.77 (1.25) | 3.09 (1.12) |
| pill       | Medium | 7.939 | 4  | 3 | 1 | 72  | 1.22 | 6.06 (2.29) | 4.00 (1.19) | 1.89 (0.99) |
| pillow     | Medium | 7.654 | 6  | 4 | 2 | 84  | 0.73 | 3.47 (1.35) | 4.44 (0.91) | 2.41 (1.23) |
| pitcher    | Medium | 7.359 | 7  | 4 | 2 | 35  | 3.42 | 6.42 (2.22) | 4.31 (0.92) | 2.46 (1.21) |
| ruler      | Medium | 7.902 | 5  | 4 | 2 | 99  | 0    | 2.52 (0.71) | 4.58 (0.81) | 1.53 (0.6)  |
| scorpion   | Medium | 7.9   | 8  | 8 | 2 | 84  | 0.66 | 3.94 (1.27) | 2.49 (1.22) | 3.49 (1.13) |
| skis       | Medium | 7.691 | 4  | 4 | 1 | 81  | 0.41 | 4.22 (1.44) | 3.04 (1.31) | 2.27 (0.97) |
| sponge     | Medium | 7.376 | 6  | 5 | 1 | 90  | 0.63 | 5.00 (2.05) | 4.26 (1.02) | 2.26 (1.12) |
| spoon      | Medium | 7.872 | 5  | 4 | 1 | 92  | 0.51 | 2.50 (0.79) | 4.56 (0.88) | 2.28 (1.19) |
| squirrel   | Medium | 7.595 | 8  | 7 | 2 | 100 | 0    | 4.44 (1.92) | 4.69 (0.72) | 2.88 (1.43) |
| telescope  | Medium | 8.109 | 9  | 8 | 3 | 95  | 0.34 | 6.95 (2.50) | 4.14 (0.98) | 2.40 (1.13) |
| toaster    | Medium | 7.569 | 7  | 5 | 2 | 97  | 0.18 | 6.72 (2.30) | 4.47 (0.80) | 2.95 (1.09) |
| tomato     | Medium | 7.667 | 6  | 6 | 3 | 100 | 0    | 2.09 (0.66) | 4.81 (0.51) | 1.23 (0.45) |

|          |        |        |   |   |   |     |       |             |             |             |
|----------|--------|--------|---|---|---|-----|-------|-------------|-------------|-------------|
| tractor  | Medium | 7.383  | 7 | 6 | 2 | 99  | 0     | 3.05 (1.23) | 3.34 (1.21) | 3.8 (1.39)  |
| trophy   | Medium | 7.693  | 6 | 5 | 2 | 93  | 0.37  | 5.55 (1.43) | 4.33 (0.82) | 2.10 (1.12) |
| umbrella | Medium | 7.565  | 8 | 7 | 3 | 100 | 0     | 5.68 (2.24) | 4.54 (0.94) | 2.51 (1.27) |
| violin   | Medium | 7.857  | 6 | 6 | 2 | 86  | 0.66  | 3.74 (1.52) | 3.31 (1.2)  | 3.47 (1.36) |
| apple    | High   | 11.095 | 5 | 3 | 2 | 99  | 0     | 1.95 (0.88) | 4.87 (0.47) | 1.46 (0.78) |
| arrow    | High   | 8.899  | 5 | 3 | 2 | 94  | 0.35  | 2.84 (0.98) | 2.86 (1.32) | 1.28 (0.55) |
| barrel   | High   | 8.83   | 6 | 5 | 2 | 86  | 0.87  | 7.72 (3.92) | 4.14 (1.05) | 2.07 (1.13) |
| baseball | High   | 9.819  | 8 | 6 | 2 | 87  | 0.8   | 4.83 (1.72) | 3.82 (1.23) | 2.44 (1.21) |
| battery  | High   | 10.221 | 7 | 6 | 3 | 95  | 0.035 | 5.58 (2.48) | 4.58 (0.72) | 3.48 (1.25) |
| brain    | High   | 10.899 | 5 | 4 | 1 | 86  | 0.81  | 4.14 (1.43) | 4.09 (1.08) | 2.86 (1.4)  |
| branch   | High   | 9.514  | 6 | 5 | 1 | 40  | 1.67  | 5.11 (2.11) | 4.32 (1.08) | 2.11 (1.07) |
| bridge   | High   | 9.871  | 6 | 4 | 1 | 90  | 0.55  | 5.58 (2.34) | 4.52 (0.67) | 2.33 (1.14) |
| bullet   | High   | 9.029  | 6 | 5 | 2 | 93  | 0.48  | 6.70 (2.13) | 4.07 (1.11) | 1.71 (0.99) |
| button   | High   | 10.32  | 6 | 4 | 2 | 100 | 0     | 4.78 (2.07) | 4.41 (0.91) | 1.62 (0.96) |
| camera   | High   | 9.822  | 6 | 5 | 2 | 82  | 0.93  | 6.00 (1.71) | 4.51 (0.85) | 3.44 (1.35) |
| chain    | High   | 10.057 | 5 | 3 | 1 | 95  | 0.3   | 5.22 (2.13) | 3.49 (1.37) | 2.15 (1.01) |
| chair    | High   | 9.83   | 5 | 3 | 1 | 100 | 0     | 1.74 (0.81) | 4.78 (0.62) | 2.08 (0.95) |
| chest    | High   | 9.474  | 5 | 4 | 1 | 33  | 3.03  | 5.05 (2.09) | 3.90 (1.03) | 2.15 (0.85) |
| clock    | High   | 10.106 | 5 | 4 | 1 | 92  | 0.46  | 4.42 (1.46) | 4.46 (0.97) | 2.69 (1.28) |
| computer | High   | 12.443 | 8 | 8 | 3 | 67  | 1.86  | 9.70 (6.04) | 4.88 (0.40) | 2.86 (1.37) |
| cross    | High   | 10.301 | 5 | 4 | 1 | 88  | 0.76  | 4.74 (1.76) | 4.55 (0.80) | 1.38 (0.66) |
| crown    | High   | 9.101  | 5 | 4 | 1 | 88  | 0.72  | 7.80 (3.35) | 4.43 (1.04) | 2.74 (1.47) |
| diamond  | High   | 9.814  | 7 | 6 | 2 | 78  | 1.1   | 4.51 (1.44) | 2.68 (1.26) | 3.1 (1.24)  |
| eagle    | High   | 8.831  | 5 | 3 | 2 | 67  | 1.61  | 5.83 (1.86) | 4.33 (1.05) | 3.19 (1.45) |
| envelope | High   | 9.289  | 8 | 7 | 3 | 100 | 0     | 6.25 (2.00) | 4.61 (0.68) | 1.82 (0.98) |
| finger   | High   | 10.534 | 6 | 5 | 2 | 90  | 0.56  | 1.47 (0.68) | 4.91 (0.36) | 1.95 (0.93) |
| football | High   | 9.786  | 8 | 6 | 2 | 98  | 0.16  | 4.84 (1.64) | 4.69 (0.56) | 1.90 (0.88) |
| glasses  | High   | 9.053  | 7 | 6 | 2 | 72  | 1.1   | 4.35 (1.29) | 4.33 (1.15) | 2.81 (1.04) |
| guitar   | High   | 10.118 | 6 | 5 | 2 | 100 | 0     | 2.76 (0.91) | 4.27 (0.98) | 2.76 (0.98) |
| hammer   | High   | 8.812  | 6 | 4 | 2 | 100 | 0     | 2.76 (0.84) | 4.4 (0.73)  | 1.77 (0.84) |
| horse    | High   | 10.08  | 5 | 4 | 1 | 99  | 0.11  | 2.00 (0.77) | 3.85 (1.08) | 3.34 (1.33) |



|            |      |        |    |   |   |     |      |              |             |             |
|------------|------|--------|----|---|---|-----|------|--------------|-------------|-------------|
| house      | High | 11.554 | 5  | 3 | 1 | 93  | 0.41 | 1.43 (0.65)  | 4.9 (0.3)   | 2.67 (1.24) |
| keyboard   | High | 10.472 | 8  | 6 | 2 | 37  | 2.86 | 9.32 (2.56)  | 4.43 (0.86) | 2.83 (1.23) |
| level      | High | 11.776 | 5  | 4 | 2 | 74  | 1.5  | 6.00 (1.37)  | 3.43 (1.46) | 2.54 (1.01) |
| match      | High | 10.465 | 5  | 3 | 1 | 92  | 0.46 | 5.72 (1.87)  | 4.41 (1.07) | 1.90 (1.19) |
| mirror     | High | 10.208 | 6  | 3 | 1 | 55  | 2.25 | 4.89 (1.97)  | 3.11 (1.53) | 3.46 (1.57) |
| mouse      | High | 10.541 | 5  | 3 | 1 | 86  | 0.91 | 4.94 (1.76)  | 4.33 (0.87) | 2.88 (1.48) |
| orange     | High | 9.509  | 6  | 5 | 2 | 100 | 0    | 1.87 (0.82)  | 4.84 (0.41) | 1.18 (0.45) |
| paint      | High | 9.678  | 5  | 4 | 1 | 28  | 3.48 | 4.45 (1.32)  | 4.49 (0.78) | 2.07 (1.03) |
| pants      | High | 9.223  | 5  | 5 | 1 | 79  | 1.12 | 3.23 (1.75)  | 4.72 (0.60) | 1.56 (0.72) |
| phone      | High | 11.861 | 5  | 3 | 1 | 51  | 1.86 | 4.11 (1.49)  | 4.72 (0.56) | 3.13 (1.42) |
| piano      | High | 9.135  | 5  | 5 | 3 | 96  | 0.25 | 3.16 (1.22)  | 3.51 (1.21) | 3.81 (1.37) |
| plane      | High | 9.835  | 5  | 4 | 1 | 100 | 0    | 2.19 (0.82)  | 4.33 (0.92) | 2.87 (1.17) |
| plant      | High | 10.136 | 5  | 5 | 1 | 84  | 0.91 | 3.95 (1.65)  | 4.15 (1.01) | 2.85 (1.33) |
| plate      | High | 9.251  | 5  | 4 | 1 | 92  | 0.48 | 3.84 (1.26)  | 4.64 (0.74) | 1.72 (0.94) |
| printer    | High | 10.612 | 7  | 6 | 2 | 87  | 0.85 | 7.61 (2.93)  | 4.39 (0.82) | 3.39 (1.26) |
| record     | High | 11.035 | 6  | 5 | 2 | 49  | 2.07 | 6.30 (2.60)  | 4.48 (0.86) | 1.64 (0.82) |
| scale      | High | 10.114 | 5  | 4 | 1 | 84  | 0.84 | 8.85 (3.57)  | 4.13 (1.13) | 2.90 (1.37) |
| scanner    | High | 9.284  | 7  | 5 | 2 | 53  | 2.23 | 11.37 (3.20) | 4.26 (0.89) | 2.88 (1.35) |
| screw      | High | 9.164  | 5  | 4 | 1 | 90  | 0.37 | 3.34 (1.12)  | 4.13 (0.97) | 1.96 (0.85) |
| shield     | High | 9.549  | 6  | 4 | 1 | 96  | 0.32 | 3.72 (1.15)  | 2.47 (1.15) | 3.25 (1.31) |
| shirt      | High | 9.006  | 5  | 3 | 1 | 99  | 0.1  | 2.39 (1.08)  | 4.78 (0.5)  | 2.23 (0.88) |
| skull      | High | 8.896  | 5  | 4 | 1 | 43  | 1.16 | 4.00 (1.34)  | 3.68 (1.22) | 3.24 (1.31) |
| speaker    | High | 9.709  | 7  | 5 | 2 | 87  | 0.85 | 6.11 (1.81)  | 4.13 (1.06) | 2.97 (1.14) |
| sword      | High | 9.726  | 5  | 4 | 1 | 97  | 0.21 | 2.70 (1.04)  | 3.06 (1.29) | 1.8 (0.76)  |
| table      | High | 10.935 | 5  | 4 | 2 | 100 | 0    | 1.73 (0.71)  | 4.91 (0.4)  | 1.53 (0.62) |
| television | High | 10.024 | 10 | 8 | 4 | 24  | 3.48 | 4.11 (1.76)  | 4.76 (0.49) | 1.78 (0.99) |
| thread     | High | 10.954 | 6  | 4 | 1 | 65  | 1.62 | 7.06 (2.92)  | 3.77 (1.35) | 2.18 (1.17) |
| tongue     | High | 9.613  | 6  | 3 | 1 | 92  | 0.22 | 1.75 (0.71)  | 4.8 (0.61)  | 2.46 (1.28) |
| tower      | High | 10.079 | 5  | 3 | 1 | 78  | 0.78 | 3.03 (1.15)  | 3.43 (1.07) | 3.15 (1.05) |
| train      | High | 10.059 | 5  | 4 | 1 | 93  | 0.41 | 2.34 (1.18)  | 4.51 (0.68) | 3.44 (1.39) |
| turkey     | High | 9.533  | 6  | 4 | 2 | 62  | 1.61 | 3.95 (1.18)  | 3.90 (1.10) | 3.14 (1.44) |

|       |      |       |   |   |   |    |      |             |             |             |
|-------|------|-------|---|---|---|----|------|-------------|-------------|-------------|
| watch | High | 10.95 | 5 | 3 | 1 | 87 | 0.65 | 4.33 (1.61) | 4.41 (1.12) | 3.08 (1.31) |
| wheel | High | 9.871 | 5 | 4 | 1 | 51 | 2.41 | 4.40 (2.09) | 4.33 (0.95) | 2.05 (0.99) |

### List of Practice Items Used in the Mock Scanner

Age of acquisition ratings for items from Brodeur, Dionne-Dotsie, Montreuil, & Lepage (2010) and Brodeur, Guérard, & Bouras (2014) were obtained from Kuperman, Stadthagen-Gonzalez, and Brysbaert (2012).

| Item         | Log HAL<br>Frequency | Length (letters) | Age of<br>Acquisition | Familiarity | Name<br>Agreement | H-Index | Number of<br>Phonemes | Number of<br>Syllables | Visual<br>Complexity |
|--------------|----------------------|------------------|-----------------------|-------------|-------------------|---------|-----------------------|------------------------|----------------------|
| basketball   | 6.51                 | 9                | 5.30 (2.20)           | 4.79 (0.47) | 95                | 0.32    | 9                     | 4                      | 1.83 (1.06)          |
| blackberry   | 6.67                 | 6                | 8.95 (6.20)           | 4.24 (1.00) | 70                | 1.57    | 4                     | 2                      | 2.68 (1.16)          |
| cactus       | 5.69                 | 8                | 6.72 (2.95)           | 4.14 (1.00) | 93                | 0.44    | 7                     | 3                      | 2.74 (1.19)          |
| cymbal       | 4.87                 | 10               | 9.94 (2.90)           | 4.12 (1.03) | 81                | 1.14    | 8                     | 3                      | 1.85 (1.04)          |
| dalmatian    | 9.98                 | 4                | 6.06 (2.71)           | 4.55 (0.71) | 71                | 1.15    | 4                     | 1                      | 3.00 (1.55)          |
| dartboard    | 5.92                 | 9                | 8.44 (3.60)           | 4.46 (0.87) | 100               | 0       | 7                     | 2                      | 2.76 (1.26)          |
| funnel       | 9.19                 | 10               | 8.44 (1.62)           | 4.63 (0.83) | 97                | 0.18    | 9                     | 3                      | 1.59 (0.81)          |
| harmonica    | 9.41                 | 4                | 7.32 (2.19)           | 4.31 (0.98) | 100               | 0       | 3                     | 1                      | 2.50 (1.15)          |
| hippopotamus | 3.85                 | 9                | 3.00 (0.99)           | 2.86 (1.22) | 82                | 0.76    | 8                     | 2                      | 2.33 (1.02)          |
| lollipop     | 4.76                 | 10               | 3.89 (1.75)           | 4.76 (0.66) | 83                | 0.93    | 9                     | 4                      | 1.57 (0.70)          |
| mascara      | 5.68                 | 9                | 9.21 (3.12)           | 4.18 (1.18) | 26                | 3.02    | 7                     | 3                      | 2.32 (1.09)          |
| pipe         | 5.95                 | 6                | 8.17 (2.23)           | 3.81 (1.25) | 50                | 2.5     | 5                     | 2                      | 1.73 (0.95)          |
| rhinoceros   | 7.1                  | 6                | 6.00 (2.83)           | 4.29 (0.97) | 51                | 1.14    | 6                     | 2                      | 3.02 (1.33)          |
| treadmill    | 4.68                 | 12               | 11.15 (4.97)          | 4.67 (0.65) | 90                | 0.61    | 11                    | 5                      | 2.62 (1.10)          |
| wolf         | 5.71                 | 7                | 4.50 (1.79)           | 4.24 (1.05) | 86                | 0.85    | 7                     | 3                      | 3.07 (1.47)          |



## **Models Used During the Mixed-Effects Logistic Regression Analysis**

The model that was run to obtain the main effects of Frequency, Age, and Frequency x Age Interaction between younger and older adults:

$$\text{Accuracy} = \text{Frequency Condition (re-coded)} * \text{AgeGroup (centered)} + (1 + \text{Frequency Condition (re-coded)}) | \text{Participant} + (1 | \text{Item})$$

This second model was run to determine if any of the properties of the words that varied across frequency conditions explained the overall frequency effects. The second model included main effects of Frequency, Age, and Frequency x Age, as well as the main effects of Name Agreement, Age of Acquisition, and Familiarity:

$$\text{Accuracy} = \text{Frequency Condition (recoded)} * \text{AgeGroup (centered)} + \text{Name Agreement} + \text{Age of Acquisition} + \text{Familiarity} + (1 + \text{Frequency Condition (recoded)}) | \text{Participant} + (1 | \text{Item})$$

**The scoring rubric used for determining correct picture-naming responses.**

| <b>Correct Response</b> | <b>Alternative Acceptable Responses</b>                 |
|-------------------------|---------------------------------------------------------|
| frisbee                 | frisbees, disc, discs                                   |
| ladybug                 | ladybug, ladybird, ladybirds                            |
| plum                    | plums                                                   |
| urinal                  | urinals                                                 |
| faucet                  | faucets                                                 |
| manatee                 | manatees                                                |
| cupcake                 | cupcakes                                                |
| tinsel                  | garland, garlands                                       |
| beehive                 | beehives, hive, hives, nest, nests                      |
| dropper                 | droppers                                                |
| stapler                 | staplers                                                |
| broom                   | brooms                                                  |
| grater                  | graters                                                 |
| moth                    | moths                                                   |
| toucan                  | toucans                                                 |
| eagle                   | eagles                                                  |
| shield                  | shields                                                 |
| hammer                  | hammers                                                 |
| sword                   | swords                                                  |
| table                   | tables                                                  |
| orange                  | oranges, clementine, clementines, tangerine, tangerines |
| pants                   | slacks, trousers                                        |
| crown                   | crowns                                                  |
| scanner                 | scanners                                                |
| horse                   | horses                                                  |
| cross                   | crosses                                                 |
| chest                   | chests, box, boxes                                      |
| television              | televisions, T.V., T.V.'s                               |
| football                | footballs                                               |
| battery                 | batteries                                               |
| ant                     | ants                                                    |
| onion                   | onions                                                  |
| lantern                 | lanterns                                                |
| harp                    | harps                                                   |
| chalk                   | —                                                       |
| mug                     | mugs                                                    |
| skis                    | ski                                                     |
| ladder                  | ladders                                                 |
| pitcher                 | pitchers                                                |

|          |                                               |
|----------|-----------------------------------------------|
| sponge   | sponges                                       |
| compass  | compasses                                     |
| curtain  | curtains                                      |
| squirrel | squirrels                                     |
| trophy   | trophies                                      |
| buddha   | buddhas                                       |
| guitar   | guitars                                       |
| plant    | plants                                        |
| finger   | fingers                                       |
| phone    | phones, telephone, telephones                 |
| brain    | brains                                        |
| mouse    | mice                                          |
| scale    | scales                                        |
| clock    | clocks                                        |
| tower    | towers, watchtower, watchtowers               |
| wheel    | wheels                                        |
| plate    | plates, dish, dishes, china                   |
| speaker  | speakers                                      |
| keyboard | keyboards                                     |
| printer  | printers                                      |
| apple    | apples                                        |
| birdie   | birdies, shuttlecock, shuttlecocks            |
| bib      | bibs                                          |
| hyena    | hyenas                                        |
| slipper  | slippers                                      |
| leek     | leeks                                         |
| tuba     | tubas                                         |
| buoy     | buoys                                         |
| beret    | berets                                        |
| tulip    | tulips                                        |
| whisk    | whisks                                        |
| raisin   | raisins                                       |
| hubcap   | hubcaps, rim, rims                            |
| cheetah  | cheetahs                                      |
| gazebo   | gazebos, pagoda, pagodas, pavilion, pavilions |
| teapot   | teapots, kettle, kettles                      |
| bacon    | —                                             |
| umbrella | umbrellas                                     |
| moose    | —                                             |
| elbow    | elbows                                        |
| barn     | barns                                         |
| lime     | limes                                         |
| scorpion | scorpions                                     |

|            |                                     |
|------------|-------------------------------------|
| feather    | feathers                            |
| bucket     | buckets                             |
| kiwi       | kiwis                               |
| peach      | peaches, apricot, apricots          |
| cooler     | coolers                             |
| spoon      | spoons                              |
| telescope  | telescopes                          |
| diploma    | diplomas, certificate, certificates |
| screw      | screws, bolt, bolts                 |
| glasses    | spectacles                          |
| mirror     | mirrors                             |
| match      | matches, matchstick, matchsticks    |
| tongue     | tongues                             |
| house      | houses, cottage, cottages           |
| turkey     | turkeys                             |
| record     | records, vinyl, vinyls              |
| button     | buttons                             |
| piano      | pianos                              |
| baseball   | baseballs                           |
| shirt      | shirts                              |
| level      | levels                              |
| chair      | chairs                              |
| paint      | paints, paint can, paint cans       |
| backpack   | backpacks, knapsack, knapsacks      |
| beaver     | beavers                             |
| ruler      | rulers                              |
| penguin    | penguins                            |
| helicopter | helicopters, chopper, choppers      |
| mushroom   | mushrooms, fungus, fungi            |
| goose      | geese                               |
| peanut     | peanuts                             |
| kite       | kites                               |
| dolphin    | dolphins                            |
| fries      | fry                                 |
| dragonfly  | dragonflies                         |
| anchor     | anchors                             |
| parrot     | parrots                             |
| violin     | violins, viola, violas              |
| dustpan    | dustpans                            |
| crayon     | crayons                             |
| dolly      | dollys                              |
| napkin     | napkins                             |
| awning     | awnings                             |

|           |                                      |
|-----------|--------------------------------------|
| giraffe   | giraffes                             |
| radish    | radishes                             |
| gavel     | gavels                               |
| scalpel   | scalpels                             |
| bandage   | bandages                             |
| tongs     | —                                    |
| apron     | aprons                               |
| vulture   | vultures                             |
| mitten    | mittens                              |
| ostrich   | ostriches                            |
| clipboard | clipboards                           |
| ferry     | ferries, ferry boat, ferry boats     |
| toaster   | toasters                             |
| tomato    | tomatoes                             |
| badger    | badgers                              |
| pill      | -pills, capsule, capsules            |
| mummy     | mummies                              |
| fridge    | fridges, refrigerator, refrigerators |
| pillow    | pillows, cushion, cushions           |
| tractor   | tractors                             |
| locker    | lockers                              |
| bee       | bees, bumblebee, bumblebees          |
| frog      | frog, frogs, toad, toads             |
| butterfly | butterflies                          |
| comb      | combs                                |
| flask     | flasks                               |
| avocado   | avocados                             |
| fondue    | —                                    |
| thimble   | thimbles                             |
| sandal    | sandals                              |
| eraser    | erasers                              |
| pliers    | —                                    |
| mussel    | mussels                              |
| raccoon   | raccoons                             |
| teabag    | teabags, tea, teas                   |
| plunger   | plungers                             |
| warthog   | warthogs                             |
| rooster   | roosters                             |
| vase      | vases                                |
| ladle     | ladles                               |
| train     | trains                               |
| camera    | cameras                              |
| chain     | chains                               |



|          |                                         |
|----------|-----------------------------------------|
| watch    | watches                                 |
| arrow    | arrows                                  |
| branch   | branches, stick, sticks                 |
| computer | computers, desktop, desktops, PC, PC's  |
| bullet   | bullets                                 |
| barrel   | barrels                                 |
| thread   | threads, spool, spools, string, strings |
| envelope | envelopes                               |
| bridge   | bridges                                 |
| skull    | skulls                                  |
| diamond  | diamonds, jewel, jewels, gem, gems      |
| plane    | planes, airplane, airplanes             |

---
